# Supplementary material
Source: PubMed Central journal article supplement (PMC7093253)

**SUPPLEMENTAL MATERIAL:**

**Supplementary Table 1.** Baseline characteristics of ARIC, DHS, and MESA participants.

|                                                   | <b>Atherosclerosis Risk in Communities Study (ARIC) (N = 9363)</b> | <b>Dallas Heart Study (DHS) (N = 2008)</b> | <b>Multi-Ethnic Study of Atherosclerosis (MESA) (N = 4339)</b> | <b>Pooled Cohort (ARIC, DHS, and MESA) (N = 15710)</b> |
|---------------------------------------------------|--------------------------------------------------------------------|--------------------------------------------|----------------------------------------------------------------|--------------------------------------------------------|
| Age – years                                       | 56.6 (52, 61)                                                      | 44.6 (37, 52)                              | 62.4 (54, 70)                                                  | 56.7 (51, 63)                                          |
| Men – n (%)                                       | 3979 (42.5)                                                        | 876 (43.6)                                 | 2028 (46.7)                                                    | 6883 (43.8)                                            |
| Race/Ethnicity                                    |                                                                    |                                            |                                                                |                                                        |
| Black – n (%)                                     | 1995 (21.3)                                                        | 1184 (59)                                  | 1818 (41.9)                                                    | 4997 (31.8)                                            |
| White – n (%)                                     | 7368 (78.7)                                                        | 824 (41)                                   | 2521 (58.1)                                                    | 10713 (68.2)                                           |
| Hypertension – n (%)                              | 2977 (31.9)                                                        | 677 (34.2)                                 | 2046 (47.2)                                                    | 5700 (36.3)                                            |
| Systolic Blood Pressure (mm Hg)                   | 120.3 (108, 130)                                                   | 125 (112.3, 134.3)                         | 127.4 (112.3, 140)                                             | 122.8 (109.3, 134)                                     |
| Diastolic Blood Pressure (mm Hg)                  | 71.9 (65, 78)                                                      | 78.6 (72, 84.3)                            | 72.4 (65.3, 79)                                                | 72.9 (66, 79)                                          |
| Anti-hypertensive therapy prescribed – n (%)      | 2639 (28.2)                                                        | 405 (20.2)                                 | 1734 (40)                                                      | 4778 (30.4)                                            |
| Diabetes – n (%)                                  | 841 (9)                                                            | 193 (9.6)                                  | 469 (10.8)                                                     | 1503 (9.6)                                             |
| Current Smoker – n (%)                            | 1812 (19.4)                                                        | 556 (27.7)                                 | 612 (14.1)                                                     | 2980 (19)                                              |
| Estimated GFR ml/min/1.73 m <sup>2</sup>          | 60.3 (53, 66)                                                      | 98.6 (84.2, 109.9)                         | 80.4 (69, 91)                                                  | 70.8 (57, 80.5)                                        |
| Total Cholesterol (mg/dL)                         | 209.5 (184, 232)                                                   | 182.1 (156, 205)                           | 193.1 (170, 215)                                               | 201.5 (175, 225)                                       |
| HDL Cholesterol (mg/dL)                           | 50.1 (38, 59)                                                      | 50.8 (41, 59)                              | 52.3 (41, 61)                                                  | 50.8 (40, 59)                                          |
| Statin therapy prescribed – n (%)                 | 511 (5.4)                                                          | 113 (5.6)                                  | 697 (16.1)                                                     | 1321 (8.4)                                             |
| Body Mass Index (BMI), kg/m <sup>2</sup>          | 28 (24.3, 30.6)                                                    | 29.7 (24.5, 33.5)                          | 28.7 (24.8, 31.7)                                              | 28.4 (24.5, 31.2)                                      |
| Waist-hip ratio                                   | 0.92 (0.87, 0.98)                                                  | 0.9 (0.84, 0.96)                           | 0.92 (0.87, 0.98)                                              | 0.92 (0.87, 0.98)                                      |
| 10-year PCE Risk Score                            | 7.4 (2.6, 10)                                                      | 4.9 (0.7, 6)                               | 13.6 (4.1, 19.7)                                               | 8.8 (2.5, 11.8)                                        |
| LV mass, gm                                       | 148.8 (117.1, 171.7)                                               | 164.5 (132.5, 189.7)                       | 123.4 (101.2, 141.3)                                           | 143.6 (112.6, 166.6)                                   |
| LV mass/BSA (g/m <sup>2</sup> )                   | 79.5 (65.9, 88.7)                                                  | 82.4 (69.7, 92.9)                          | 64.6 (56.2, 71.2)                                              | 75.2 (62.2, 84.6)                                      |
| LV wall thickness (mm)                            | 9.9 (8.9, 10.6)                                                    | 11.6 (10.4, 12.7)                          | 9.4 (8.1, 10.5)                                                | 10.1 (8.8, 11.1)                                       |
| LV ejection fraction (%)                          | 65.3 (62, 69.3)                                                    | 72 (67.9, 77.2)                            | 62.1 (58.4, 66.4)                                              | 65.5 (61.3, 70.1)                                      |
| ECG with LVH – n (%)                              | 799 (8.5)                                                          | 198 (9.9)                                  | 424 (9.8)                                                      | 1421 (9.1)                                             |
| Hs-c-Tn-T ≥ 6 ng/l - n(%)                         | 2396 (25.6)                                                        | 222 (11.1)                                 | 1674 (38.6)                                                    | 4292 (27.3)                                            |
| NT-proBNP ≥ 100 pg/ml - n (%)                     | 1836 (20.2)                                                        | 220 (11)                                   | 1258 (29)                                                      | 3314 (21.1)                                            |
| High-sensitivity C-reactive protein (hsCRP), mg/L | 4 (1, 4.4)                                                         | 5.1 (1.1, 6.7)                             | 4 (0.9, 4.5)                                                   | 4.1 (1, 4.7)                                           |

**Supplementary Table 2.** Baseline characteristics among men and women in the pooled cohort stratified by race/ethnicity.

|                                                   | <b>Black Men<br/>(N = 2007)</b> | <b>White Men<br/>(N = 4876)</b> | <b>Black Women<br/>(N = 2990)</b> | <b>White Women<br/>(N = 5837)</b> |
|---------------------------------------------------|---------------------------------|---------------------------------|-----------------------------------|-----------------------------------|
| Age – years                                       | 55.9 (49, 64)                   | 57.4 (52, 63)*                  | 55.2 (49, 62)                     | 57.1 (51, 63)†                    |
| Hypertension – n (%)                              | 983 (49.3)                      | 1484 (30.5)*                    | 1584 (53.3)                       | 1649 (28.3)†                      |
| Systolic Blood Pressure (mm Hg)                   | 128.9 (114.7, 140.7)            | 121.8 (110, 131.7)*             | 128.3 (113.7, 139.3)              | 118.8 (106, 129.7)†               |
| Diastolic Blood Pressure (mm Hg)                  | 78.2 (71, 84.3)                 | 73.8 (67.7, 80)*                | 75.1 (68, 81.7)                   | 69.2 (63, 75.3)†                  |
| Anti-hypertensive therapy prescribed – n (%)      | 734 (36.3)                      | 1209 (24.8)*                    | 1321 (44.1)                       | 1526 (26.1)†                      |
| Diabetes – n (%)                                  | 310 (15.5)                      | 359 (7.4)*                      | 482 (16.1)                        | 352 (6)†                          |
| Current Smoker – n (%)                            | 535 (26.7)                      | 850 (17.4)*                     | 573 (19.2)                        | 1022 (17.5)                       |
| Estimated GFR ml/min/1.73 m <sup>2</sup>          | 85 (69.1, 98)                   | 67.9 (57.3, 75.9)*              | 81.7 (64.3, 94.6)                 | 62.7 (52.2, 69.1)†                |
| Total Cholesterol (mg/dL)                         | 189.4 (163, 213)                | 198.6 (174, 222)*               | 199.5 (171, 225)                  | 209.1 (184, 232)†                 |
| HDL Cholesterol (mg/dL)                           | 47.5 (38, 54)                   | 42.8 (34, 49)*                  | 56 (45, 64)                       | 56 (44, 65)†                      |
| Statin therapy prescribed – n (%)                 | 158 (7.8)                       | 419 (8.6)                       | 253 (8.4)                         | 491 (8.4)                         |
| Body Mass Index (BMI), kg/m <sup>2</sup>          | 28.5 (25.1, 31.1)               | 27.8 (25, 30)*                  | 31.4 (26.6, 35.3)                 | 27.3 (23.2, 30.2)†                |
| Waist-hip ratio                                   | 0.94 (0.91, 1)                  | 0.97 (0.93, 1)*                 | 0.9 (0.84, 0.95)                  | 0.88 (0.82, 0.94)†                |
| 10-year PCE Risk Score                            | 13.1 (5.7, 17.4)                | 11.3 (4.9, 14.9)*               | 8.8 (1.9, 12)                     | 5.2 (1.4, 6)                      |
| LV mass, gm                                       | 170 (137.3, 194)                | 163.2 (132.5, 185.5)*           | 134.2 (108.9, 152.8)              | 123 (100.4, 139.3)†               |
| LV mass/BSA (g/m <sup>2</sup> )                   | 83.3 (68.8, 94.2)               | 80.6 (66.8, 90.3)*              | 71 (59.8, 79.4)                   | 70.1 (58.4, 78.1)†                |
| LV wall thickness (mm)                            | 11.4 (10, 12.7)                 | 10.5 (9.3, 11.4)*               | 10.1 (8.9, 11.1)                  | 9.2 (8.4, 10)†                    |
| LV ejection fraction (%)                          | 63.7 (58.8, 69.4)               | 63.8 (60.1, 68.3)               | 67.8 (62.7, 73.1)                 | 66.4 (62.6, 70.5)†                |
| ECG with LVH – n (%)                              | 432 (21.5)                      | 340 (7)*                        | 438 (14.7)                        | 211 (3.6)†                        |
| Hs-c-Tn-T ≥ 6 ng/l - n(%)                         | 973 (48.5)                      | 1817 (37.3)*                    | 563 (18.8)                        | 939 (16.1)†                       |
| NT-proBNP ≥ 100 pg/ml - n (%)                     | 245 (12.7)                      | 632 (13.4)                      | 573 (19.5)                        | 1864 (32.1)†                      |
| High-sensitivity C-reactive protein (hsCRP), mg/L | 3.8 (0.95, 4.2)                 | 2.7 (0.8, 3)*                   | 6.1 (1.6, 8.1)                    | 4.4 (1, 5.1)†                     |

\* p < 0.05 versus black men † p < 0.05 versus black women

**Supplementary Table 3.** Prevalence of left ventricular hypertrophy (LVH) with and without abnormal biomarkers, stratified by body mass index (BMI) categories.

|                         | <b>&lt; 25kg/m<sup>2</sup></b> | <b>25 - &lt; 30</b> | <b>≥ 30</b>  | <b>P trend</b> |
|-------------------------|--------------------------------|---------------------|--------------|----------------|
| <b>LVH-</b>             | 4295 (93.6%)                   | 5561 (90.9%)        | 4433 (88.8%) | <.0001         |
| <b>LVH+, either+</b>    | 157 (3.4%)                     | 302 (4.9%)          | 298 (6.0%)   | <.0001         |
| <b>LVH+, both-</b>      | 142 (3.1%)                     | 262 (4.3%)          | 260 (5.2%)   | <.0001         |
| <b>LVH+, hs-cTnT+</b>   | 108 (2.4%)                     | 250 (4.1%)          | 249 (5.0%)   | <.0001         |
| <b>LVH+, hs-cTnT-</b>   | 195 (4.2%)                     | 327(5.3%)           | 319 (6.4%)   | <.0001         |
| <b>LVH+, NT-proBNP+</b> | 95 (2.1%)                      | 135 (2.2%)          | 133 (2.7%)   | 0.049          |
| <b>LVH+, NT-proBNP-</b> | 201 (4.4%)                     | 422 (6.9%)          | 419 (8.4%)   | <.0001         |

**Supplementary Table 4.** Multivariable adjusted associations of race and risk factors with prevalence of malignant left ventricular hypertrophy (LVH).

| <b>Variable</b>                                                    | <b>Men<br/>Adjusted OR (95% CI)</b> | <b>Women<br/>Adjusted OR (95% CI)</b> |
|--------------------------------------------------------------------|-------------------------------------|---------------------------------------|
| <b>Black Race</b>                                                  | 2.84 (2.26-3.56)                    | 2.46 (1.88-3.23)                      |
| <b>Age (per 10 years)</b>                                          | 1.20 (1.07-1.34)                    | 1.24 (1.08-1.42)                      |
| <b>Average Systolic BP (per 10 mm Hg)</b>                          | 1.34 (1.27-1.41)                    | 1.32 (1.25-1.39)                      |
| <b>Anti-hypertensive medications<br/>(yes/no)</b>                  | 1.90 (1.53-2.36)                    | 1.92 (1.48-2.48)                      |
| <b>Diabetes (yes/no)</b>                                           | 1.10 (0.83-1.47)                    | 0.94 (0.68-1.32)                      |
| <b>Current smoking (yes/no)</b>                                    | 0.76 (0.58-1.01)                    | 1.04 (0.75-1.44)                      |
| <b>Total cholesterol (per SD increment)</b>                        | 1.07 (0.97-1.19)                    | 1.03 (0.92-1.16)                      |
| <b>HDL cholesterol (per SD increment)</b>                          | 1.05 (0.95-1.15)                    | 1.00 (0.88-1.13)                      |
| <b>Estimated glomerular filtration rate<br/>(per SD increment)</b> | 0.89 (0.79-1.00)                    | 0.88 (0.77-1.01)                      |

**Supplementary Table 5.** Adjusted hazard ratios (with 95% CI) for development of heart failure (HF) in patients with benign and malignant left ventricular hypertrophy (LVH), stratified by body mass index (BMI) category.

| <b>Adjusted HR</b>      | <b>&lt; 25kg/m<sup>2</sup></b> | <b>25- &lt; 30</b> | <b>≥ 30</b>    | <b><u>P interaction</u></b> |
|-------------------------|--------------------------------|--------------------|----------------|-----------------------------|
| <b>LVH-</b>             | <b>Ref</b>                     | <b>Ref</b>         | <b>Ref</b>     |                             |
| <b>LVH+, either+</b>    | 1.6 (0.8-3.2)                  | 3.2 (2.0-4.9)      | 2.9 (2.1-4.1)  | 0.24                        |
| <b>LVH+, both-</b>      | 0.3 (0.04-2.5)                 | 1.8 (0.9-3.4)      | 0.6 (0.3-1.4)  |                             |
| <b>LVH+, hs-cTnT+</b>   | 2.0 (0.96-4.1)                 | 3.2 (2.0-5.1)      | 2.8 (1.9- 4.0) | 0.18                        |
| <b>LVH+, hs-cTnT-</b>   | 0.4 (0.1-1.8)                  | 2.3 (1.4-3.8)      | 1.1 (0.6-1.9)  |                             |
| <b>LVH+, NT-proBNP+</b> | 1.5 (0.6-3.4)                  | 4.1 (2.4-7.1)      | 4.6 (3.0-7.0)  | 0.20                        |
| <b>LVH+, NT-proBNP-</b> | 0.8 (0.3-2.6)                  | 2.0 (1.2-3.2)      | 1.1 (0.7-1.7)  |                             |

**Supplementary Table 6.** Unadjusted and multivariate adjusted hazard ratios for development of heart failure (HF) in patients with and without left ventricular hypertrophy (LVH), further stratified by biomarker status.

|                                         | <b>Unadjusted Hazard Ratio<br/>(95% Confidence Limits)</b> | <b>Adjusted Hazard Ratio (95%<br/>Confidence Limits)</b> |
|-----------------------------------------|------------------------------------------------------------|----------------------------------------------------------|
| <b>LVH (+)<br/>Either Biomarker (+)</b> | 9.1 (7.0-11.9)                                             | 4.3 (3.2-5.9)                                            |
| <b>LVH (+)<br/>Biomarker (-)</b>        | 1.8 (1.1-2.9)                                              | 1.4 (0.8-2.3)                                            |
| <b>LVH (-)<br/>Either Biomarker (+)</b> | 3.0 (2.4-3.7)                                              | 2.0 (1.5-2.5)                                            |
| <b>LVH (-)<br/>Biomarker (-)</b>        | <i>-- Reference Group --</i>                               |                                                          |

**Supplementary Table 7.** Unadjusted and multivariate adjusted hazard ratios for development of heart failure (HF) in patients with and without left ventricular hypertrophy (LVH), evaluating abnormal high-sensitivity cardiac troponin-T (hs-cTnT) and N-terminal pro-brain natriuretic peptide (NT-proBNP) individually.

|                                  | <b>Unadjusted Hazard Ratios (95% HR Confidence Limits)</b> | <b>Adjusted Hazard Ratios (95% HR Confidence Limits)</b> |
|----------------------------------|------------------------------------------------------------|----------------------------------------------------------|
| <b>LVH (+)<br/>Hs-cTnT (+)</b>   | 5.4 (4.3-6.8)                                              | 2.7 (2.1-3.6)                                            |
| <b>LVH (+)<br/>Hs-cTnT (-)</b>   | 1.5 (1.1-2.2)                                              | 1.4 (0.95-2.0)                                           |
| <b>LVH (+)<br/>NT-proBNP (+)</b> | 7.4 (5.7-9.6)                                              | 3.7 (2.7-5.1)                                            |
| <b>LVH (+)<br/>NT-proBNP (-)</b> | 1.7 (1.3-2.3)                                              | 1.3 (0.96-1.8)                                           |
| <b>LVH (-)</b>                   | <i>-- Reference Group --</i>                               |                                                          |

**Supplementary Table 8.** Prevalence of baseline magnetic resonance imaging (MRI)-defined left ventricular hypertrophy (LVH) and abnormal biomarkers (High-sensitivity cardiac troponin-T (hs-cTnT)  $\geq 6$  and N-terminal pro-brain natriuretic peptide (NT-proBNP)  $\geq 100$ ), among men and women in the Dallas Heart Study (DHS) and the Multiethnic Study of Atherosclerosis (MESA), stratified by race/ethnicity.

| <b>Men</b>                                                         |                            |                             |                | <b>Women</b>                |                             |                |
|--------------------------------------------------------------------|----------------------------|-----------------------------|----------------|-----------------------------|-----------------------------|----------------|
|                                                                    | <b>Black<br/>(N = 999)</b> | <b>White<br/>(N = 1281)</b> | <b>P value</b> | <b>Black<br/>(N = 1312)</b> | <b>White<br/>(N = 1401)</b> | <b>P value</b> |
| <b>MRI-LVH (+)<br/>Biomarker (+)<br/>(Malignant LVH)<br/>n (%)</b> | 106 (10.6)                 | 52 (4.1)                    | <0.0001        | 102 (7.8)                   | 56 (4.0)                    | <0.0001        |
| <b>MRI-LVH (+)<br/>Biomarker (-)<br/>n (%)</b>                     | 57 (5.7)                   | 31 (2.4)                    | <0.0001        | 99 (7.6)                    | 44 (3.1)                    | <0.0001        |
| <b>MRI-LVH (-)<br/>n (%)</b>                                       | 836 (83.7)                 | 1198 (93.5)                 | <0.0001        | 1111 (84.7)                 | 1301 (92.9)                 | <0.0001        |



**Supplementary Figure 1. Flow Diagram for Participant Inclusion/Exclusion.**

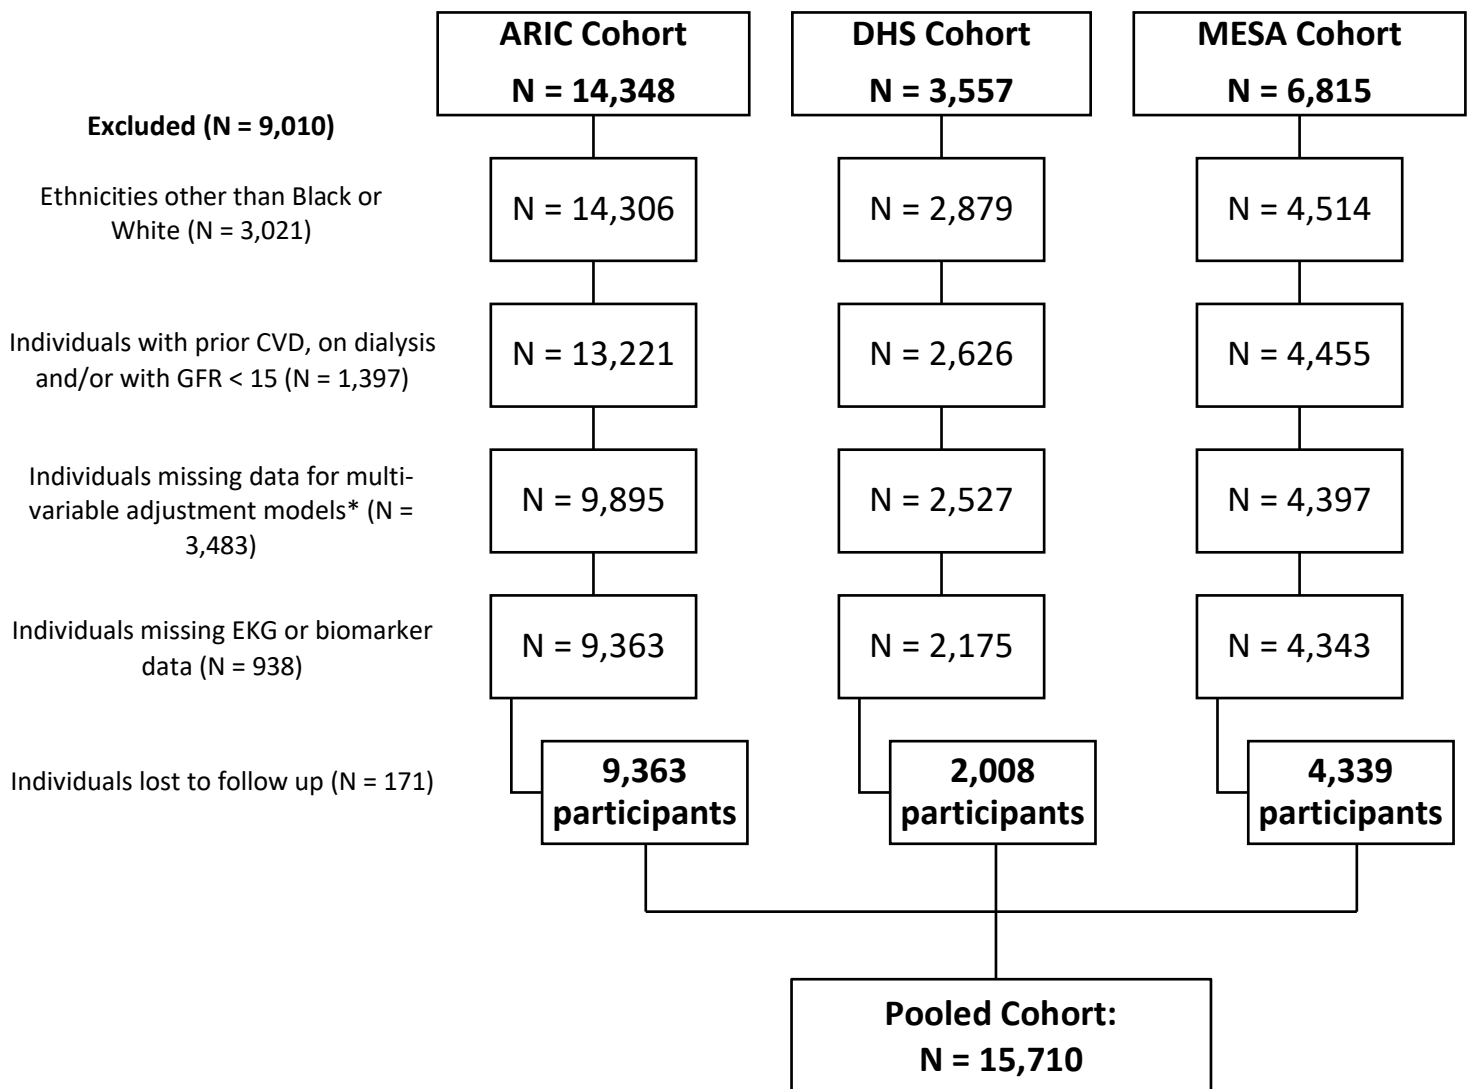

\*Models included age, sex, total and HDL cholesterol, smoking, systolic blood pressure, antihypertensive and statin therapy, diabetes, creatinine and BMI

**Supplementary Figure 2.** Unadjusted and adjusted associations between electrocardiography (ECG)-defined left ventricular hypertrophy (LVH) and chronic myocardial injury-based categories and risk of heart failure stratified by number of abnormal biomarkers.

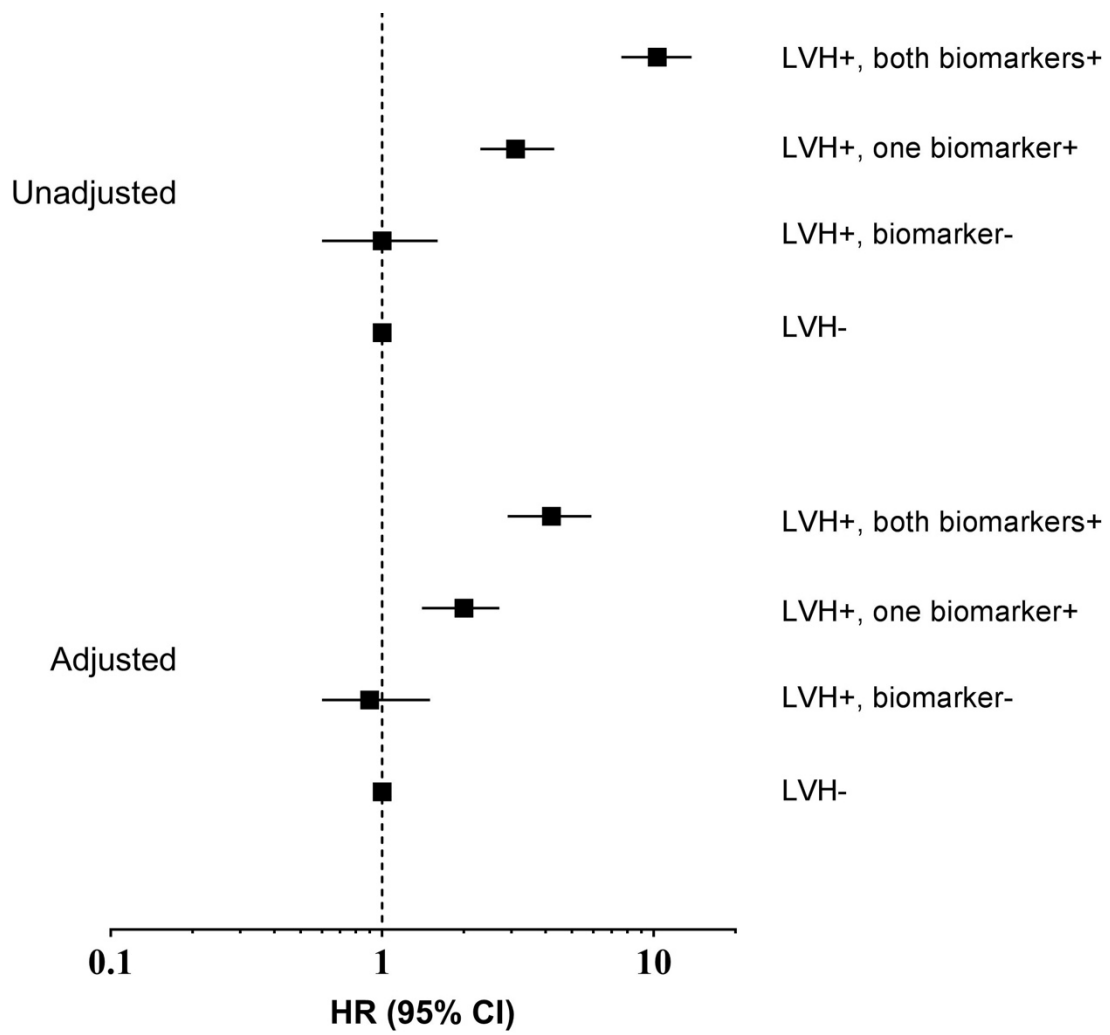

**Supplementary Figure 3.** Unadjusted Kaplan-Meier curves for incident heart failure (HF) in black men (a), white men (b), black women (c), and white women (d).

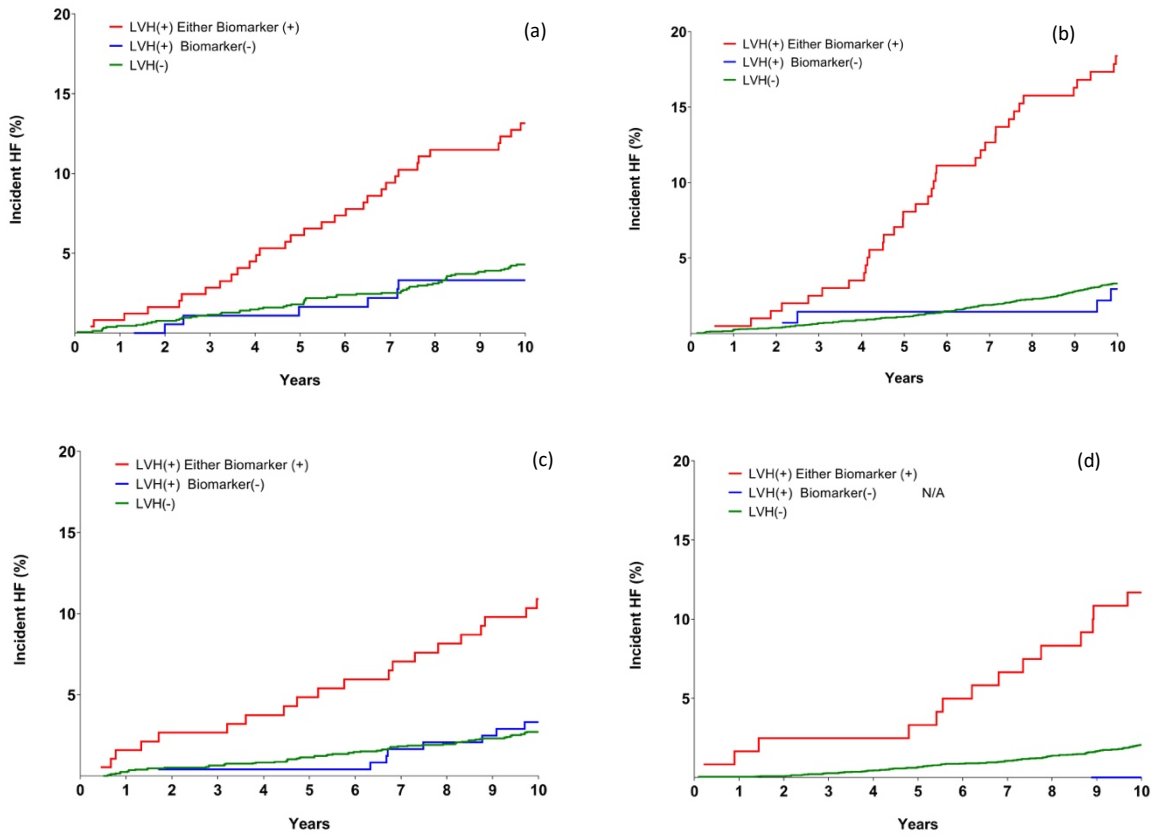

**Supplementary Figure 4.** Unadjusted Kaplan-Meier curves for incident heart failure (HF) overall, replacing electrocardiography (ECG)-defined left ventricular hypertrophy (LVH) with magnetic resonance imaging (MRI)-defined LVH (DHS and MESA only).

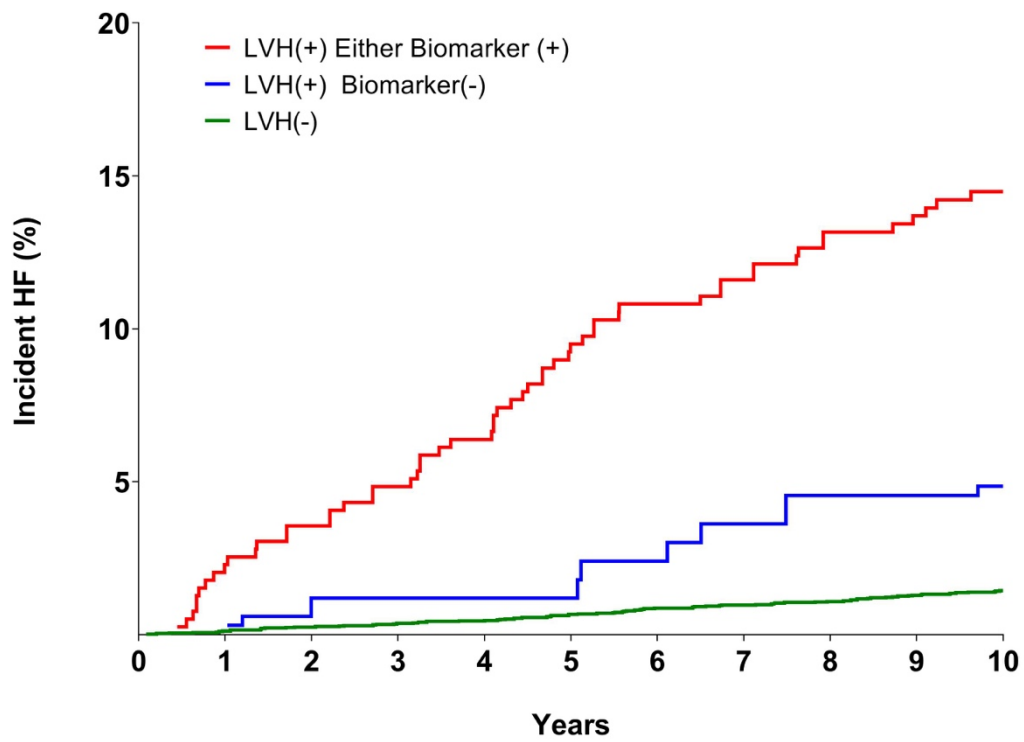

Supplement: NIHMS1558591-supplement-Supplemental_Publication_Material.pdf [file NIHMS1558591-supplement-Supplemental_Publication_Material.pdf]
